# Supplementary material for: Uterine adenomyosis is an oligoclonal disorder associated with KRAS mutations
Source: PubMed Central journal article supplement (PMC6923389; doi:10.1038/s41467-019-13708-y), 2019-12-19
Supplement: 41467_2019_13708_MOESM3_ESM.pdf [file 41467_2019_13708_MOESM3_ESM.pdf]

## Description of Additional Supplementary Files

File Name: Supplementary Data 1

Description: Clinical characteristics of the adenomyosis patient cohort.

File Name: Supplementary Data 2

Description: Clinical characteristics of patients except for Figure 5.

File Name: Supplementary Data 3

Description: Method used to detect genomic alterations in tissue samples.

File Name: Supplementary Data 4

Description: Read depth of whole exome sequencing for all tissue samples.

File Name: Supplementary Data 5

Description: PCR primers used in this study.

File Name: Supplementary Data 6

Description: SNVs in adenomyosis detected by WES.

File Name: Supplementary Data 7

Description: SNVs in endometriosis detected by WES.

File Name: Supplementary Data 8

Description: SNVs in leiomyoma detected by WES.

File Name: Supplementary Data 9

Description: SNVs in ovarian cancer detected by WES.

File Name: Supplementary Data 10

Description: WES read information for pathogenic COSMIC mutations.

File Name: Supplementary Data 11

Description: Pseudo-positive pathogenic mutations assessed by TDS.

File Name: Supplementary Data 12

Description: Somatic driver mutations as assessed by TDS.

File Name: Supplementary Data 13

Description: Targeted deep sequencing read information of LCM.

File Name: Supplementary Data 14

Description: Multisampling information shown in Figure 3A.

File Name: Supplementary Data 15

Description: Multisampling information shown in Figure 3B.

File Name: Supplementary Data 16

Description: Multisampling information shown in Figure 3C.

File Name: Supplementary Data 17

Description: Multisampling information shown in Figure 4A.

File Name: Supplementary Data 18

Description: Multisampling information shown in Figure 4B.

File Name: Supplementary Data 19

Description: Multisampling information shown in Figure 4C.

File Name: Supplementary Data 20

Description: Multisampling information shown in Figure 4D–F.

File Name: Supplementary Data 21

Description: LCM experiments shown in Figures 4G–I.

File Name: Supplementary Data 22

Description: Patients' characteristics and KRAS mutation related to Table 1.

File Name: Supplementary Data 23

Description: Patients' characteristics and NGS experiments shown in Figure 5.

File Name: Supplementary Data 24

Description: Patients' characteristics and SNV between disease types shown in Figure 5.

File Name: Supplementary Data 25

Description: Patients' characteristics and KRAS mutation status shown in Figure 5.

File Name: Supplementary Data 26

Description: TDS read information shown in Figures 5.

File Name: Supplementary Data 27

Description: Bisulfite sequencing of PR-A/B shown in Figure 8.

File Name: Supplementary Data 28

Description: NGS read information shown in Supplementary Figure 16.

File Name: Supplementary Data 29

Description: NGS read information shown in Supplementary Figure 17.
