# Supplementary material for: Uterine adenomyosis is an oligoclonal disorder associated with KRAS mutations
Source: PubMed Central journal article supplement (PMC6923389; doi:10.1038/s41467-019-13708-y), 2019-12-19
Supplement: 41467_2019_13708_MOESM33_ESM.pdf [file 41467_2019_13708_MOESM33_ESM.pdf]

## Reporting Summary

Nature Research wishes to improve the reproducibility of the work that we publish. This form provides structure for consistency and transparency in reporting. For further information on Nature Research policies, see [Authors & Referees](#) and the [Editorial Policy Checklist](#).

### Statistics

For all statistical analyses, confirm that the following items are present in the figure legend, table legend, main text, or Methods section.

n/a Confirmed

- |                                     |                                     |                                                                                                                                                                                                                                                            |
|-------------------------------------|-------------------------------------|------------------------------------------------------------------------------------------------------------------------------------------------------------------------------------------------------------------------------------------------------------|
| <input type="checkbox"/>            | <input checked="" type="checkbox"/> | The exact sample size ( $n$ ) for each experimental group/condition, given as a discrete number and unit of measurement                                                                                                                                    |
| <input type="checkbox"/>            | <input checked="" type="checkbox"/> | A statement on whether measurements were taken from distinct samples or whether the same sample was measured repeatedly                                                                                                                                    |
| <input type="checkbox"/>            | <input checked="" type="checkbox"/> | The statistical test(s) used AND whether they are one- or two-sided<br><i>Only common tests should be described solely by name; describe more complex techniques in the Methods section.</i>                                                               |
| <input checked="" type="checkbox"/> | <input type="checkbox"/>            | A description of all covariates tested                                                                                                                                                                                                                     |
| <input checked="" type="checkbox"/> | <input type="checkbox"/>            | A description of any assumptions or corrections, such as tests of normality and adjustment for multiple comparisons                                                                                                                                        |
| <input type="checkbox"/>            | <input checked="" type="checkbox"/> | A full description of the statistical parameters including central tendency (e.g. means) or other basic estimates (e.g. regression coefficient) AND variation (e.g. standard deviation) or associated estimates of uncertainty (e.g. confidence intervals) |
| <input type="checkbox"/>            | <input checked="" type="checkbox"/> | For null hypothesis testing, the test statistic (e.g. $F$ , $t$ , $r$ ) with confidence intervals, effect sizes, degrees of freedom and $P$ value noted<br><i>Give <math>P</math> values as exact values whenever suitable.</i>                            |
| <input checked="" type="checkbox"/> | <input type="checkbox"/>            | For Bayesian analysis, information on the choice of priors and Markov chain Monte Carlo settings                                                                                                                                                           |
| <input checked="" type="checkbox"/> | <input type="checkbox"/>            | For hierarchical and complex designs, identification of the appropriate level for tests and full reporting of outcomes                                                                                                                                     |
| <input checked="" type="checkbox"/> | <input type="checkbox"/>            | Estimates of effect sizes (e.g. Cohen's $d$ , Pearson's $r$ ), indicating how they were calculated                                                                                                                                                         |

*Our web collection on [statistics for biologists](#) contains articles on many of the points above.*

### Software and code

Policy information about [availability of computer code](#)

Data collection FlowJo software (version 10) for FACs analysis. GIMP (version 2.8) (<https://www.gimp.org/>) for western blotting image analysis. Bcl2fastq-1.8.4 (Illumina) for WES data collection.

Data analysis GraphPad Prism (version 5) and Microsoft Excel for most of data analyses. bwa-0.7.12, bowtie2-2.1.0, novocraftV3.02.08.Linux2.6, samtools-0.1.19, bamUtil-1.0.9, GenomeAnalysisTK-2.7-2, snpEff-v4.1b, annovar\_2014nov, tabix-0.2.6, muTect-1.1.4, VarScan.v2.3.6, GenomeAnalysisTK-2.3-9 (SomaticIndelDetector) for SNV detection/WES data analyses. Wellcome Trust Sanger Institute mutational signatures framework (ref: Alexandrov LB, Nik-Zainal S, Wedge DC, et al.

For manuscripts utilizing custom algorithms or software that are central to the research but not yet described in published literature, software must be made available to editors/reviewers. We strongly encourage code deposition in a community repository (e.g. GitHub). See the Nature Research [guidelines for submitting code & software](#) for further information.

### Data

Policy information about [availability of data](#)

All manuscripts must include a [data availability statement](#). This statement should provide the following information, where applicable:

- Accession codes, unique identifiers, or web links for publicly available datasets
- A list of figures that have associated raw data
- A description of any restrictions on data availability

WES data are available through the National Bioscience Database Center (ID: JGAS00000000169). All other data are available in the manuscript, Supplementary Methods or Source Data. The source data underlying Figures 5B and 6B-D are provided as a Source Data file.

## Field-specific reporting

Please select the one below that is the best fit for your research. If you are not sure, read the appropriate sections before making your selection.

- Life sciences     Behavioural & social sciences     Ecological, evolutionary & environmental sciences

For a reference copy of the document with all sections, see [nature.com/documents/nr-reporting-summary-flat.pdf](https://www.nature.com/documents/nr-reporting-summary-flat.pdf)

## Life sciences study design

All studies must disclose on these points even when the disclosure is negative.

|                 |                                                                                                                                                                                                                                                                                                                                                                                                                                        |
|-----------------|----------------------------------------------------------------------------------------------------------------------------------------------------------------------------------------------------------------------------------------------------------------------------------------------------------------------------------------------------------------------------------------------------------------------------------------|
| Sample size     | No sample-size calculation was performed.                                                                                                                                                                                                                                                                                                                                                                                              |
| Data exclusions | No data were excluded from the analyses.                                                                                                                                                                                                                                                                                                                                                                                               |
| Replication     | Data reproducibility was examined by six independent experiments per group with three technical replicates within each of the experiments (Figure 6B), four independent experiments per group without technical replicates (Figure 6C), and six independent experiments per group with three technical replicates (three wells/samples) (Figure 6D). Reproducibility of western blotting was confirmed by two independent experiments. |
| Randomization   | Cells were randomly allocated to the various conditions.                                                                                                                                                                                                                                                                                                                                                                               |
| Blinding        | Scoring of all PR-IHC was performed blind by T.H.Y. to avoid evaluator bias. Investigators were blinded to group allocation during data collection.                                                                                                                                                                                                                                                                                    |

## Reporting for specific materials, systems and methods

We require information from authors about some types of materials, experimental systems and methods used in many studies. Here, indicate whether each material, system or method listed is relevant to your study. If you are not sure if a list item applies to your research, read the appropriate section before selecting a response.

### Materials & experimental systems

- | n/a                                 | Involvement in the study                                        |
|-------------------------------------|-----------------------------------------------------------------|
| <input type="checkbox"/>            | <input checked="" type="checkbox"/> Antibodies                  |
| <input type="checkbox"/>            | <input checked="" type="checkbox"/> Eukaryotic cell lines       |
| <input checked="" type="checkbox"/> | <input type="checkbox"/> Palaeontology                          |
| <input checked="" type="checkbox"/> | <input type="checkbox"/> Animals and other organisms            |
| <input type="checkbox"/>            | <input checked="" type="checkbox"/> Human research participants |
| <input checked="" type="checkbox"/> | <input type="checkbox"/> Clinical data                          |

### Methods

- | n/a                                 | Involvement in the study                           |
|-------------------------------------|----------------------------------------------------|
| <input checked="" type="checkbox"/> | <input type="checkbox"/> ChIP-seq                  |
| <input type="checkbox"/>            | <input checked="" type="checkbox"/> Flow cytometry |
| <input checked="" type="checkbox"/> | <input type="checkbox"/> MRI-based neuroimaging    |

## Antibodies

|                 |                                                                                                                                                                                                  |
|-----------------|--------------------------------------------------------------------------------------------------------------------------------------------------------------------------------------------------|
| Antibodies used | anti-PR(clone: 1E2, Veentana, Cat.No: 790-2223). anti-Vinculin (clone SPM227, abcam, Cat.No: ab18058). anti-HA (clone 6E2, CST, Cat.No: 23675).                                                  |
| Validation      | Specificity of the anti-HA and anti-vincludin antibodies was validated by overexpression of HA or shRNA of PR. Specificity of the anti-PR antibody was validated by PR-negative patient samples. |

## Eukaryotic cell lines

Policy information about [cell lines](#)

|                                                                      |                                                                                                        |
|----------------------------------------------------------------------|--------------------------------------------------------------------------------------------------------|
| Cell line source(s)                                                  | 293T: ATCC. Immortalized epithelial endometrial cell was generated by Dr. Muraoka (Nagoya University). |
| Authentication                                                       | None of cell lines were authenticated.                                                                 |
| Mycoplasma contamination                                             | All cell lines were tested negative for mycoplasma contamination.                                      |
| Commonly misidentified lines<br>(See <a href="#">ICLAC</a> register) | No commonly misidentified cell lines were used.                                                        |

## Human research participants

Policy information about [studies involving human research participants](#)

|                            |                                                                                                                                                                                                                                                                         |
|----------------------------|-------------------------------------------------------------------------------------------------------------------------------------------------------------------------------------------------------------------------------------------------------------------------|
| Population characteristics | All requested information is provided in Table 1 and Supplementary Tables 1, 2, 22 and 23 in this manuscript.                                                                                                                                                           |
| Recruitment                | Patients with adenomyosis gave written informed consent prior to their participation in this study were obtained at the University of Tokyo Hospital and Juntendo University Hospital between December 2016 and July 2019.                                              |
| Ethics oversight           | This project was approved by the institutional ethics committees of the University of Tokyo (Project Number G10035), the Juntendo University Faculty of Medicine (Project Number 2014176), and the National Cancer Center Research Institute (Project Number 2015–202). |

Note that full information on the approval of the study protocol must also be provided in the manuscript.

## Flow Cytometry

### Plots

Confirm that:

- The axis labels state the marker and fluorochrome used (e.g. CD4-FITC).
- The axis scales are clearly visible. Include numbers along axes only for bottom left plot of group (a 'group' is an analysis of identical markers).
- All plots are contour plots with outliers or pseudocolor plots.
- A numerical value for number of cells or percentage (with statistics) is provided.

### Methodology

|                           |                                                                                                                                                                                                                                                                                                                                                                                                                                                                                                                                                                                                             |
|---------------------------|-------------------------------------------------------------------------------------------------------------------------------------------------------------------------------------------------------------------------------------------------------------------------------------------------------------------------------------------------------------------------------------------------------------------------------------------------------------------------------------------------------------------------------------------------------------------------------------------------------------|
| Sample preparation        | Cells were collected 45 min after BrdU exposure, washed by PBS(-), fixed in Cytofix/Cytoperm buffer (BD Bioscience; APC-BrdU kit, Cat.No:557892) and permeabilized with Cytofix/Cytoperm buffer (BD Bioscience; APC-BrdU kit, Cat.No:557892). The cells were fixed with Cytofix/Cytoperm buffer (BD Bioscience; APC-BrdU kit, Cat.No:557892), were exposed to DNase (BD Bioscience; APC-BrdU kit, Cat.No:557892). The cells were stained with APC-anti-BrdU Ab (BD Bioscience; APC-BrdU kit, Cat.No:557892) for 1h at 4 degrees, followed by 7-AAD (BD Bioscience; APC-BrdU kit, Cat.No:557892) for 10 min. |
| Instrument                | BD FACs Canto II                                                                                                                                                                                                                                                                                                                                                                                                                                                                                                                                                                                            |
| Software                  | Flow Jo software (Version 10)                                                                                                                                                                                                                                                                                                                                                                                                                                                                                                                                                                               |
| Cell population abundance | No cell sorting was performed.                                                                                                                                                                                                                                                                                                                                                                                                                                                                                                                                                                              |
| Gating strategy           | Based on FSC vs SSC, cellular debris and cell doublets were excluded.                                                                                                                                                                                                                                                                                                                                                                                                                                                                                                                                       |

- Tick this box to confirm that a figure exemplifying the gating strategy is provided in the Supplementary Information.
